# Supplementary material for: Polymorphism Analysis Reveals Reduced Negative Selection and Elevated Rate of Insertions and Deletions in Intrinsically Disordered Protein Regions
Source: PubMed Central journal article supplement — Genome Biol Evol. 2015 Jun 4;7(6):1815–26. doi: 10.1093/gbe/evv105 (PMC4494057; doi:10.1093/gbe/evv105), 2015-06-04
Supplement: supp_evv105_Khan_FigureS3.pdf [file supp_evv105_Khan_FigureS3.pdf]

Fold increase in  
inferred sub.  
rate due to  
mis-alignment

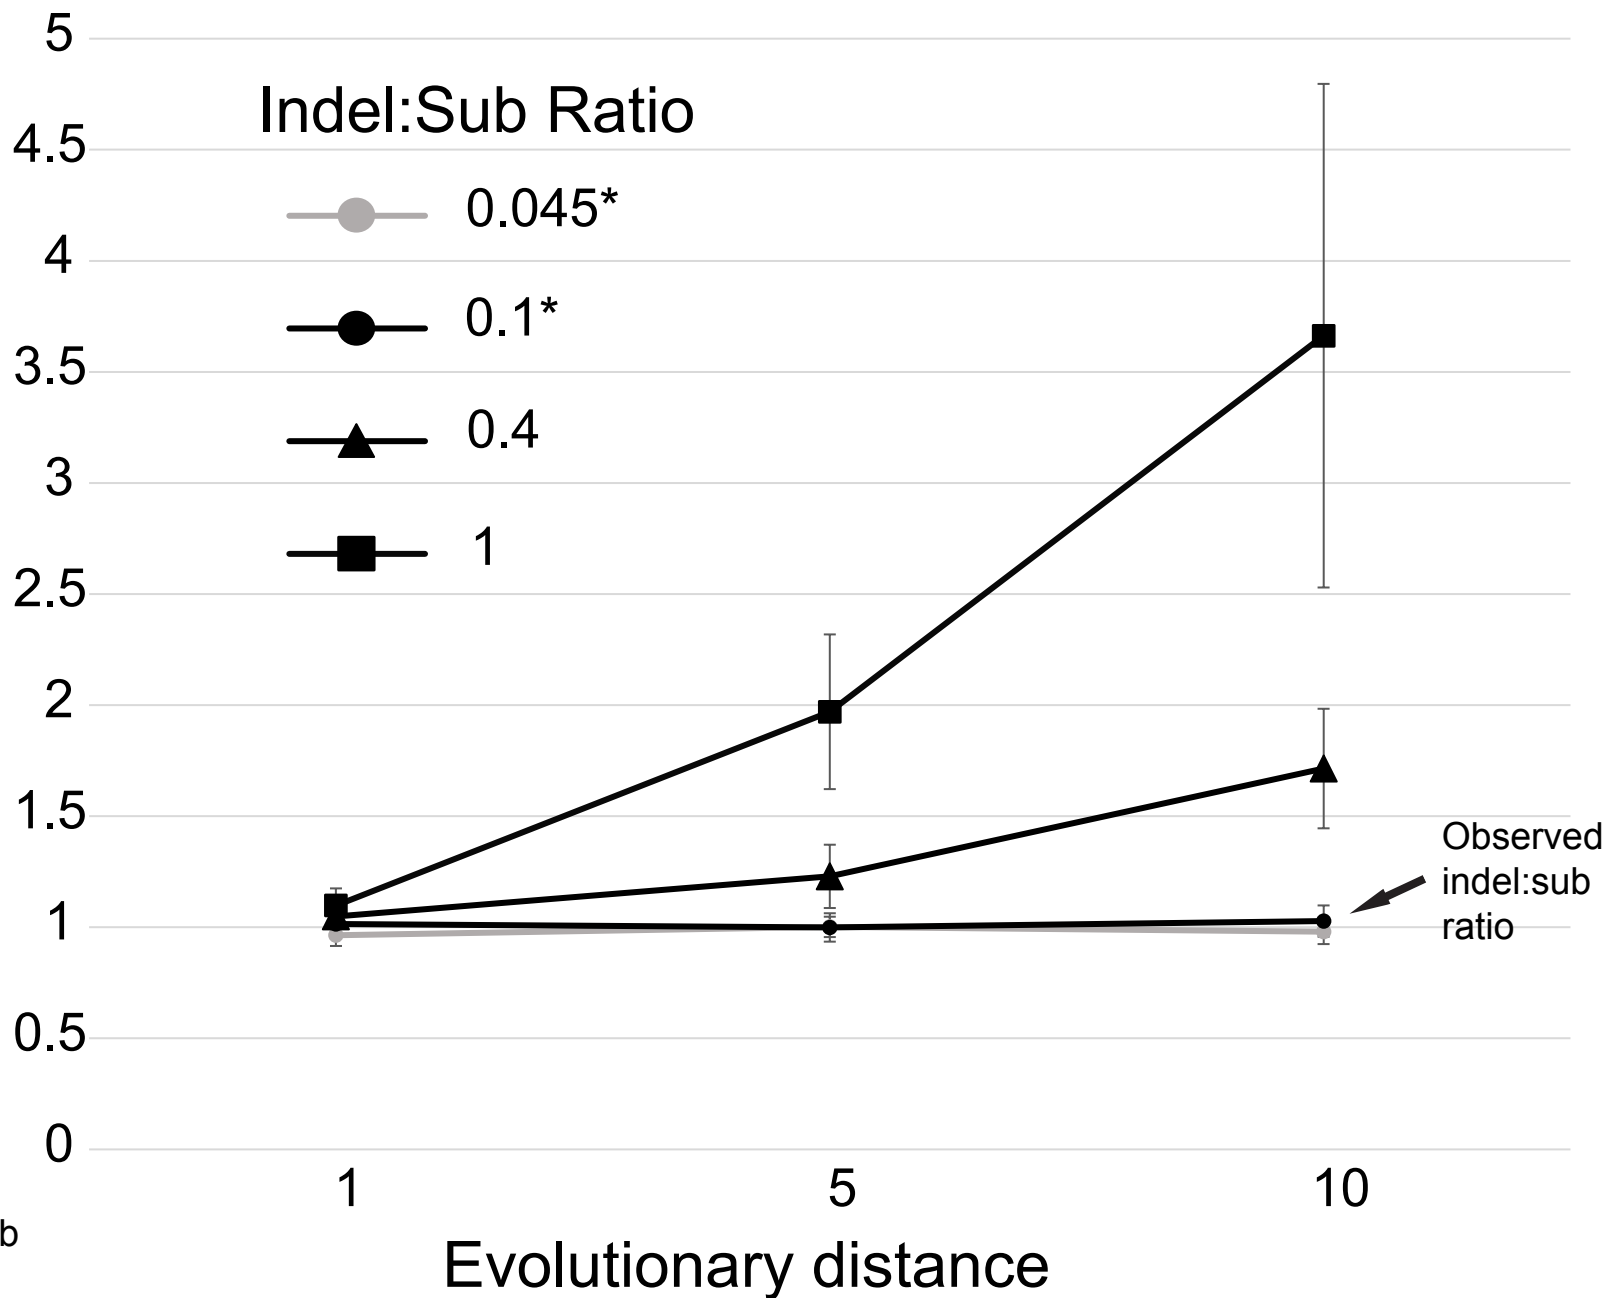

\*Lower and upper bound  
estimates of actual indel:sub  
ratio in disordered regions
